# Supplementary material
Source: publisher site journal article supplement (https://www.kjim.org/upload/media/kjim-2023-263-Supplementary-Table-1.pdf)
Supplement: Supplementary file 1 [file kjim-2023-263-Supplementary-Table-1.pdf]

**Supplementary Table 1. Institutional Review Board approval number and date for each center participating in the study**

| Center                                                     | Approval number | Approval date |
|------------------------------------------------------------|-----------------|---------------|
| Asan Medical Center, Seoul, South Korea                    | 2020-0888       | 2020-05-26    |
| Keimyung University School of Medicine, Daegu, South Korea | 2020-04-009     | 2020-04-16    |
| Pusan National University Hospital, Pusan, South Korea     | 2009-005-094    | 2020-09-08    |
| Gangnam Severance Hospital, Seoul, South Korea             | 3-2020-0412     | 2020-11-18    |
| Chonnam National Medical School, Gwangju, South Korea      | CNUHH-2020-130  | 2020-07-06    |
